# Supplementary material for: Coenzyme Q10 inhibits the activation of pancreatic stellate cells through PI3K/AKT/mTOR signaling pathway
Source: PubMed Central journal article supplement (PMC5696182; doi:10.18632/oncotarget.21247), 2017-09-23
Supplement: oncotarget-08-92300-s001.pdf [file oncotarget-08-92300-s001.pdf]

## Coenzyme Q10 inhibits the activation of pancreatic stellate cells through PI3K/AKT/mTOR signaling pathway

### SUPPLEMENTARY MATERIALS

Supplementary Table 1: The filters for Figure 1 generation

| Fluorophore     | Excitation peak (nm) | Emission peak (nm) |
|-----------------|----------------------|--------------------|
| Alexa Fluor 488 | 488                  | 519                |
| Hoechst 33258   | 346                  | 460                |
| Alexa Fluor 594 | 591                  | 614                |

**Supplementary Table 2: 6 sets of primers were designed using the Primer Explorer version 4 software (Eiken Chemical Co., Ltd., Tokyo, Japan; <http://primerexplorer.jp/elamp4.0.0/index.html>) and synthesized by Shanghai Sangon Co., Ltd**

| Primer name  | Length (bp) | Primer sequence(5' to 3') |
|--------------|-------------|---------------------------|
| Collagen I   | 26          | GGGGCAAGACAGTCATCGAA      |
| Collagen I   | 26          | GAACCAGATTGGGGTGGAGG      |
| Collagen III | 26          | GCGAGCGGCTGAGTTTTATG      |
| Collagen III | 26          | GCAGCTCAGAGTAGCACCAT      |
| MMP-13       | 26          | ATGGTCCAGGCGATGAAGAC      |
| MMP-13       | 26          | GCATCAAGGGATAGGGCTGG      |
| TIMP-1       | 27          | CAACTCGGACCTGGATGCTAA     |
| TIMP-1       | 26          | ACTCTTCACTGCGGTTCTGG      |
| MMP-2        | 26          | AACGGTCGGGAATACAGCAG      |
| MMP-2        | 26          | AAACAAGGCTTCATGGGGGC      |
| TIMP-2       | 26          | TCTGGATGGACTGGGTCACA      |
| TIMP-2       | 27          | GTTGATGCAGGCGAAGAACTT     |

Sequences of the primers used in this study

**Supplementary Table 3: Antibodies and conditions used for western blotting analyses**

| Antibody                   | Number  | Species                    | Dilution | Source                    |
|----------------------------|---------|----------------------------|----------|---------------------------|
| $\alpha$ -SMA              | ab5694  | Rabbit polyclonal antibody | 1:500    | Abcam                     |
| desmin                     | ab32362 | Rabbit monoclonal antibody | 1:1000   | Abcam                     |
| Beclin1                    | #3738   | Rabbit polyclonal antibody | 1:1000   | Cell Signaling Technology |
| Atg5                       | #12994  | Rabbit monoclonal antibody | 1:1000   | Cell Signaling Technology |
| LC3B                       | L7543   | Rabbit polyclonal antibody | 1:1000   | Sigma                     |
| SQSTM1/p62                 | #5114   | Rabbit polyclonal antibody | 1:1000   | Cell Signaling Technology |
| $\beta$ -Actin (13E5)      | #4970   | Rabbit monoclonal antibody | 1:1000   | Cell Signaling Technology |
| Phospho-mTOR (Ser2448)     | #2971   | Rabbit polyclonal antibody | 1:1000   | Cell Signaling Technology |
| Phospho-Akt (Ser473)       | #4060   | Rabbit monoclonal antibody | 1:1000   | Cell Signaling Technology |
| PI3 Kinase p85 (19H8)      | #4257   | Rabbit monoclonal antibody | 1:1000   | Cell Signaling Technology |
| Akt                        | #9272   | Rabbit polyclonal antibody | 1:1000   | Cell Signaling Technology |
| Bax                        | #2772   | Rabbit polyclonal antibody | 1:1000   | Cell Signaling Technology |
| Bcl-2 (D17C4)              | # 3498  | Rabbit monoclonal antibody | 1:1000   | Cell Signaling Technology |
| Caspase-3 (8G10)           | #9665   | Rabbit monoclonal antibody | 1:1000   | Cell Signaling Technology |
| Cleaved Caspase-3 (Asp175) | #9664   | Rabbit monoclonal antibody | 1:1000   | Cell Signaling Technology |
| Collagen III               | ab7778  | Rabbit polyclonal antibody | 1:1500   | Abcam                     |
| Collagen I                 | ab6803  | Mouse monoclonal antibody  | 1:1000   | Abcam                     |
